# Supplementary material for: Passive fractionating mechanism for oil spill using shear-wettability modulation
Source: Royal Society of Chemistry journal article supplement (doi:10.1039/d4nr01235f), 2024-01-01
Supplement: d4nr01235f1.pdf [file d4nr01235f1.pdf]

## Supplementary Information

# Passive Fractionating Mechanism for Oil Spill Using Shear-Wettability Modulation

Vinay Arya<sup>1</sup>, Abhirup Chaudhuri<sup>2</sup> and Chirodeep Bakli<sup>1\*</sup>

<sup>1</sup>Thermofluidics and Nanotechnology for Sustainable Energy Systems Laboratory, School of Energy Science and Engineering, Indian Institute of Technology Kharagpur, India

<sup>2</sup>Department of Mechanical Engineering, Indian Institute of Technology Kharagpur, India

### SI. Force field equations and parameters

The force field equations are mathematically expressed using the set of equations S1-S5 which are as follows:

$$U(\mathbf{r}) = U_{non-bonded}(\mathbf{r}) + U_{bond}(\mathbf{r}) + U_{angle}(\mathbf{r}) + U_{dihedral}(\mathbf{r}) \quad (S1)$$

where,

$$U_{non-bonded}(\mathbf{r}) = f_{ij} \left[ \frac{q_i q_j}{r_{ij}^2} + 4\varepsilon_{ij} \left[ \left( \frac{\sigma_{ij}}{r_{ij}} \right)^{12} - \left( \frac{\sigma_{ij}}{r_{ij}} \right)^6 \right] \right] \quad (S2)$$

$$U_{bond} = k_b (r - r_0)^2 \quad (S3)$$

$$U_{angle} = k_\theta (\theta - \theta_0)^2 \quad (S4)$$

$$U_{dihedral} = 0.5k_1 (1 + \cos(\phi)) + 0.5k_2 (1 + \cos(2\phi)) + 0.5k_3 (1 + \cos(3\phi)) + 0.5k_4 (1 + \cos(4\phi)) \quad (S5)$$

Moreover, Table S1 indicates the parameters used for the simulations performed.

**Table S1.** Interaction parameters in the simulations<sup>1</sup>

| Non-bonded interaction parameters (used in Equation 2) |                    |               |        |
|--------------------------------------------------------|--------------------|---------------|--------|
|                                                        | $\varepsilon$ (eV) | $\sigma$ (nm) | Charge |

|                                                      |                 |                     |            |
|------------------------------------------------------|-----------------|---------------------|------------|
| Graphene C                                           | 0.07            | 0.355               | 0          |
| Terminal alkane C                                    | 0.002862        | 0.35                | -0.18      |
| Other carbons in alkanes                             | 0.002862        | 0.35                | -0.12      |
| Hydrogen atoms                                       | 0.001301        | 0.25                | 0.06       |
| Bond interaction parameters (used in Equation 3)     |                 |                     |            |
| Bonds                                                | $k_b (eV)$      | $r_0 (nm)$          |            |
| C-C                                                  | 11.6216         | 0.1529              |            |
| C-H                                                  | 14.7438         | 0.1090              |            |
| Angle Interaction parameters (used in Equation 4)    |                 |                     |            |
| Angles                                               | $k_\theta (eV)$ | $\theta_0 (^\circ)$ |            |
| C-C-C                                                | 2.5303          | 112.7               |            |
| H-C-C                                                | 1.6262          | 110.7               |            |
| H-C-H                                                | 1.4310          | 107.8               |            |
| Dihedral Interaction parameters (used in Equation 5) |                 |                     |            |
| Dihedrals                                            | $k_1 (eV)$      | $k_2 (eV)$          | $k_3 (eV)$ |
| C-C-C-C                                              | 0.07545         | -0.00681            | 0.01210    |
| H-C-C-C                                              | 0               | 0                   | 0.01587    |
| H-C-C-H                                              | 0               | 0                   | 0.01379    |

### SII. Results from $NPzT$ simulations

**Table S2.** Number of water ( $N_{water}$ ) and  $n$ -dodecane ( $N_{D12}$ ) molecules for different  $n$ -dodecane mass percentages (DMP) and wall wettability ( $\varepsilon$ ) values obtained from  $NPzT$  simulations

| DMP                | Number of Molecules                  |                                      |                                      |
|--------------------|--------------------------------------|--------------------------------------|--------------------------------------|
|                    | $\varepsilon = 0.2 \text{ kJ/mol}$   | $\varepsilon = 0.5 \text{ kJ/mol}$   | $\varepsilon = 1 \text{ kJ/mol}$     |
| Pure water         | $N_{water}: 12869$                   | $N_{water}: 13090$                   | $N_{water}: 13253$                   |
| 5%                 | $N_{D12}: 67$<br>$N_{water}: 12019$  | $N_{D12}: 68$<br>$N_{water}: 12248$  | $N_{D12}: 69$<br>$N_{water}: 12425$  |
| 10%                | $N_{D12}: 132$<br>$N_{water}: 11222$ | $N_{D12}: 135$<br>$N_{water}: 11441$ | $N_{D12}: 136$<br>$N_{water}: 11585$ |
| 15%                | $N_{D12}: 195$<br>$N_{water}: 10456$ | $N_{D12}: 198$<br>$N_{water}: 10630$ | $N_{D12}: 201$<br>$N_{water}: 10776$ |
| 20%                | $N_{D12}: 256$<br>$N_{water}: 9683$  | $N_{D12}: 261$<br>$N_{water}: 9860$  | $N_{D12}: 264$<br>$N_{water}: 9994$  |
| 40%                | $N_{D12}: 487$<br>$N_{water}: 6912$  | $N_{D12}: 496$<br>$N_{water}: 7029$  | $N_{D12}: 499$<br>$N_{water}: 7071$  |
| 60%                | $N_{D12}: 696$<br>$N_{water}: 4384$  | $N_{D12}: 703$<br>$N_{water}: 4427$  | $N_{D12}: 711$<br>$N_{water}: 4480$  |
| 80%                | $N_{D12}: 886$<br>$N_{water}: 2092$  | $N_{D12}: 899$<br>$N_{water}: 2122$  | $N_{D12}: 904$<br>$N_{water}: 2135$  |
| Pure $n$ -dodecane | $N_{D12}: 1066$                      | $N_{D12}: 1085$                      | $N_{D12}: 1092$                      |

### References

<sup>1</sup> S. Schmitt, F. Fleckenstein, H. Hasse, and S. Stephan, “Comparison of Force Fields for the Prediction of Thermophysical Properties of Long Linear and Branched Alkanes,” *J. Phys. Chem. B* **127**(8), 1789–1802 (2023).
